1 **Organelle genome assembly uncovers the dynamic genome reorganization and cytoplasmic male**  
2 **sterility associated genes in tomato.**

3 **Running title:** Organelle genomes of CMS tomato

4

5 Kosuke Kuwabara<sup>1</sup>, Issei Harada<sup>1</sup>, Yuma Matsuzawa<sup>2</sup>, Tohru Ariizumi<sup>1,3\*</sup>, and Kenta Shirasawa<sup>4\*</sup>

6 <sup>1</sup>Graduate School of Life and Environmental Sciences, University of Tsukuba, Tsukuba, Ibaraki 305-8577,

7 Japan

8 <sup>2</sup>TOKITA Seed Co. LTD., Kazo, Saitama 349-1144, Japan

9 <sup>3</sup>Tsukuba Plant Innovation Research Center, Tsukuba, Ibaraki 305-8577, Japan

10 <sup>4</sup>Kazusa DNA Research Institute, Kisarazu, Chiba 292-0818, Japan

11

12 **E-mail addresses of all authors**

13 KK: s1921107@s.tsukuba.ac.jp

14 IH: s2021044@s.tsukuba.ac.jp

15 YM: ymatsuzawa@tokitaseed.co.jp

16 TA: ariizumi.toru.ge@u.tsukuba.ac.jp

17 KS: shirasaw@kazusa.or.jp

18

19 **\*Co-corresponding authors:**

20 Tohru Ariizumi

21 Tel. and Fax: +81-29 853 4710

22 Kenta Shirasawa

23 Tel.: +81-438 52 3935

24 Fax: +81-438 52 3934

25

26 **Abstract**

27 To identify cytoplasmic male sterility (CMS)-associated genes in tomato, we determined the genome  
28 sequences of mitochondria and chloroplasts in three CMS tomato lines derived from independent  
29 asymmetric cell fusions, their nuclear and cytoplasmic donors, and male fertile weedy cultivated tomato  
30 and wild relatives. The structures of the CMS mitochondrial genomes were highly divergent from those  
31 of the nuclear and cytoplasmic donors, and genes of the donors were mixed up in these genomes. On the  
32 other hand, the structures of CMS chloroplast genomes were moderately conserved across the donors, but  
33 CMS chloroplast genes were unexpectedly likely derived from the nuclear donors. Comparative analysis  
34 of the structures and contents of organelle genes and transcriptome analysis identified three genes that  
35 were uniquely present in the CMS lines, but not in the donor or fertile lines. RNA sequencing analysis  
36 indicated that these three genes transcriptionally expressed in anther, two of which were also expressed in  
37 pollen. They could be potential candidates for CMS-associated genes. This study suggests that organelle  
38 reorganization mechanisms after cell fusion events differ between mitochondria and chloroplasts, and  
39 provides insight into the development of new F1 hybrid breeding programs employing the CMS system in  
40 tomato.

41

42 **Keywords:** Tomato, cytoplasmic male sterility, organelle genomes, mitochondria, RNA-Seq

43

44 **Introduction**

45 Cytoplasmic male sterility (CMS) is broadly found in the kingdom of Plantae<sup>1</sup>. CMS plants cannot  
46 produce seeds by self-pollination due to a lack of male fertility; therefore, pollen from other plants is  
47 always required for these plants to produce seeds. CMS is caused by the incompatibility of interactions of  
48 genetic information between nuclei and organelles, especially mitochondria<sup>1</sup>. The genes in nuclei and  
49 organelles are called *restore of fertility (RF)* genes and CMS-associated genes, respectively. Therefore,  
50 CMS plants have been used as materials for studies of interactions between nuclear and cytoplasmic  
51 genes. Moreover, CMS is used in breeding programs to produce F1 hybrid seeds<sup>1</sup>, in which cytoplasmic  
52 and pollen donors are employed as maternal and paternal parents, respectively.

53 CMS plants can be artificially generated by recurrent backcrossing or transgenic approaches<sup>2,3</sup>,  
54 which leads to incompatibility between nuclei and organelles. A tomato CMS line, called CMS-pennellii,  
55 which possesses nuclei and cytoplasm from *Solanum pennellii* and *Solanum peruvianum*, respectively,  
56 has been developed by recurrent backcrossing<sup>2</sup>. A gene knockdown strategy is also used to develop CMS  
57 tomato lines, for which expression of a nuclear gene that regulates mitochondrial substoichiometric  
58 shifting has been suppressed<sup>3</sup>. In addition, other types of CMS tomato lines have been generated via  
59 asymmetric cell fusion between cultivated tomato lines, namely, *Solanum lycopersicum* as the nuclear  
60 donor and a wild potato relative, *Solanum acaule*, as the cytoplasmic donor<sup>4</sup>. Among CMS lines, MSA1  
61 has been well-studied to reveal nucleus-organelle incompatibility<sup>4</sup>. A physical map of the mitochondrial  
62 genome of MSA1 indicates that this asymmetric cell fusion hybrid has a complex mitochondrial genome  
63 structure consisting of the parental genomes<sup>5</sup>. Transcripts of an open reading frame (ORF), *orf206*, of the  
64 hybrid mitochondrial genome are heterogeneously edited<sup>6</sup>. However, no candidates of CMS-associated  
65 genes have been identified in tomato.

66 Although CMS-associated gene sequences are not conserved across plant species, they have  
67 common features<sup>7</sup>. Most CMS-associated gene candidates usually possess transmembrane regions and  
68 chimeric structures, so-called fusion genes, of genes involved in respiration. Based on this information,  
69 CMS-associated genes have been identified in *Oryza sativa*<sup>8,9</sup>, *Helianthus annuus*<sup>10</sup>, and *Gossypium*  
70 *hirsutum*<sup>11</sup>. RNA-sequencing (RNA-Seq) based on next-generation sequencing technology has been  
71 employed to select candidates uniquely expressed in CMS lines of *Brassica juncea*<sup>12</sup>. Further functional  
72 studies are required to confirm that these candidates are involved in CMS. Introduction of *RF* genes into  
73 CMS lines would be a useful approach because CMS-associated genes can be downregulated in the  
74 presence of *RF* genes<sup>7</sup>. Another approach is to introduce CMS-associated genes into fertile lines to induce  
75 sterility<sup>13</sup>. More recently, it has become possible to alter or edit gene sequences of mitochondrial genomes  
76 with TALEN technology<sup>14</sup>. This technology has been used to disrupt CMS-associated genes in  
77 mitochondrial genomes and thereby generate *Arabidopsis thaliana*, *Oryza sativa*, and *Brassica napus*  
78 with CMS<sup>14,15</sup>.

79 In parallel with MSA1, as shown in Figure 1, two asymmetric cell fusions were developed

80 between cultivated tomato lines *S. lycopersicum* ('O' and 'P') as nuclear donors and a wild potato relative,  
81 *S. acaule*, as the cytoplasmic donor<sup>16</sup>. The nuclear genome backgrounds of the three cell fusion lines  
82 including MSA1 were replaced with the genomes of cultivated tomato lines by a repeated backcrossing  
83 strategy. The resultant CMS lines are designated 'CMS[MSA1]', 'CMS[O]', and 'CMS[P]'. Therefore,  
84 it may be possible to identify CMS-associated genes by comparative analysis of the genomes and  
85 transcriptomes of the CMS lines and their nuclear donors. In this study, we determined the sequences of  
86 the organelle genomes of the CMS lines and their donors. Subsequently, the genome sequences and gene  
87 expression patterns were compared to identify CMS-associated gene candidates. Furthermore, the results  
88 of this analysis may provide insights into the cytoplasmic genome features of asymmetric cell fusions.

89

## 90 **Results**

### 91 *De novo assembly of chloroplast and mitochondrial genomes*

92 A total of 10.5 Gb reads per sample were obtained from three CMS tomato lines ('CMS[MSA1]',  
93 'CMS[O]', and 'CMS[P]'), three nuclear donors ('Sekai-ichi', 'O', and 'P'), and one cytoplasmic  
94 donor (*S. acaule*). Of them, 374 Mb (3.6%) and 566 Mb (5.4%) of reads per sample were aligned on  
95 publicly available sequences of mitochondrial and chloroplast genomes, respectively. The reads mapped  
96 on the two sets of reference sequences were separately assembled into contig sequences.

97 Mitochondrial genome sequences were constructed with reads mapped on the mitochondrial  
98 reference sequences (Table 1). The mitochondrial genomes of the nuclear donors 'Sekai-ichi', 'O', and 'P'  
99 were all constructed from only contigs with assembly sizes of 562.6 kb ( $n = 2$ ,  $n$  represents contig  
100 numbers), 536.9 kb ( $n = 2$ ), and 553.3 kb ( $n = 2$ ), respectively. In *S. acaule*, 728.4 kb contigs ( $n = 7$ ) for  
101 the mitochondrial genome were established. The assembly sizes were longer in the CMS lines than in the  
102 nuclear and cytoplasmic donors, specifically, they were 995.2 kb ( $n = 7$ ) in 'CMS[MSA1]', 968.4 kb ( $n$   
103 = 7) in 'CMS[O]', and 829.3 kb ( $n = 5$ ) in 'CMS[P]'. For chloroplast genomes, total sequence lengths  
104 of 389.2 kb ( $n = 2$ ), 349.5 kb ( $n = 2$ ), and 346.9 kb ( $n = 2$ ) were constructed for 'Sekai-ichi', 'O', and 'P',  
105 respectively (Table 1). There were two contig sequences in each of the three nuclear donors. The  
106 assembly sizes were shorter in 'CMS[MSA1]' (296.6 kb,  $n = 1$ ) and 'CMS[O]' (307.1 kb,  $n = 1$ ) than in  
107 the nuclear donors, but longer in 'CMS[P]' (454.1 kb,  $n = 3$ ).

108 Comparative genome analysis revealed that the mitochondrial genomes of the CMS lines consisted  
109 of highly fragmented, repeated, and duplicated sequences derived from both donors throughout the  
110 genome (Figure 2). On the other hand, the structures of the chloroplast genomes of the CMS lines were  
111 moderately conserved across the nuclear and cytoplasmic donors (Figure 2).

112 In parallel, we determined the mitochondrial and chloroplast genome sequences of *Solanum*  
113 *pimpinellifolium* LA1670 and *S. lycopersicum* var. *cerasiforme* LA1673 (Table 1). Sequence reads were  
114 obtained from a public DNA database and processed as described above. Assembly sizes of the  
115 mitochondrial and chloroplast genomes were 620.6 kb ( $n = 3$ ) and 299.4 kb ( $n = 1$ ) for *S. pimpinellifolium*

116 LA1670, respectively, and 569.9 kb ( $n = 2$ ) and 337.7 kb ( $n = 2$ ) for *S. lycopersicum* var. *cerasiforme*  
117 LA1673, respectively.

118

#### 119 *Gene prediction from the organelle genomes*

120 ORFs encoding  $\geq 25$  amino acids were extracted from the assembled sequences to predict potential genes.  
121 The number of potential genes predicted from the chloroplast genome assemblies ranged from 5,130 (*S.*  
122 *acaule*) to 8,165 (‘CMS[P]’) and the number of potential genes predicted from the mitochondrial  
123 sequences ranged from 10,326 (‘O’) to 19,170 (‘CMS[MSA1]’) (Table 1).

124 The ORFs were clustered to identify genes unique to and shared among the CMS lines, nuclear  
125 donors, and cytoplasmic donor (Figure 3). The ORFs in the CMS mitochondrial genomes consisted of  
126 four types of genes, namely, those unique to the CMS lines (Type 1: 9.4–11.9%), those shared with the  
127 nuclear donors only (Type 2: 14.1–17.0%), those shared with the cytoplasmic donor only (Type 3:  
128 8.9–13.2%), and those shared with both the nuclear and cytoplasmic donors (Type 4: 61.8–64.1%). By  
129 contrast, the ORFs in the CMS chloroplast genomes mostly consisted of three types of genes, namely,  
130 those unique to the CMS lines (Type 1: 1.2–5.9%), those shared with the nuclear donors only (Type 2:  
131 31.2–33.1%), and those shared with both the nuclear and cytoplasmic donors (Type 4: 62.9–65.7%). Few  
132 genes shared with the cytoplasmic donor only were found (Type 3: up to 0.1%).

133 The genome positions of the genes differed according to the gene type and organelle (Figure 4).  
134 Type 1 genes in mitochondria were distributed across the genome with some gaps. The positions of Type  
135 2 genes were basically the same as those of Type 1 genes, while Type 3 genes were located in the gaps  
136 between Type 1 genes. Type 4 genes were also located in the gaps and at the ends of contig sequences. On  
137 the other hand, in chloroplast genomes, the positions of Type 1 and 2 genes overlapped and Type 4 genes  
138 were located at the ends of contigs.

139

#### 140 *Screening of CMS-associated gene candidates*

141 To identify candidates of CMS-associated genes in the mitochondrial genomes, we set the following four  
142 criteria: 1) amino acid length  $\geq 70$ , 2) absent from male fertile lines, 3) present in all three CMS lines, and  
143 4) expressed in anthers of the CMS lines. Among the predicted genes in the ‘CMS[P]’, ‘CMS[MSA1]’,  
144 and ‘CMS[O]’ mitochondrial genomes, 831, 1,025, and 969 genes encoded  $\geq 70$  amino acids,  
145 respectively. The gene sequences from the CMS lines were compared with the mitochondrial genomes of  
146 the nuclear donors (‘Sekai-ichi’, ‘P’, and ‘O’) and *S. pimpinellifolium* LA1670, *S. lycopersicum* var.  
147 *cerasiforme* LA1673), *S. pennellii*, and *Nicotiana tabacum*. In total, 183, 272, and 140 genes were  
148 selected because they were absent from the nuclear donors and Solanaceae relatives, all of which possess  
149 male fertility. Furthermore, we selected 36, 41, and 33 genes commonly present in the CMS lines. The  
150 copy numbers of the genes varied. Finally, RNA-Seq reads were mapped on the mitochondrial genomes  
151 of the CMS lines. This analysis limited the number of CMS-associated gene candidates to four, including

152 two identical sequences. The three genes were named *orf137* (two copies in the genome of each CMS  
153 line: CMS-PMt002g07240 and CMS-PMt005g13392), *orf193* (one copy: CMS-PMt002g06465), and  
154 *orf265* (one copy: CMS-PMt010g15739).

155 *De novo* transcriptome assembly was performed in parallel. RNA-Seq data were obtained from the  
156 anthers of ‘P’ and ‘CMS[P]’, and assembled into 62 and 43 transcript sequences, respectively, of which  
157 37 ‘P’ and 18 ‘CMS[P]’ transcripts were predicted to have transmembrane domains. Of these sequences,  
158 eight were uniquely detected in ‘CMS[P]’. Two genes (STRG.32.1.p1 and STRG.39.1.p1) were identical  
159 to *orf137* and *orf265*.

160 Because two genes were commonly identified in both analyses, a total of nine genes were finally  
161 selected as candidates of CMS-associated genes (Table 2). Sequence similarity searches with the  
162 mitochondrial and chloroplast genomes indicated that two copies of the STRG.32.1.p1 (*orf137*) sequence  
163 (CMS-PMt002g07240 and CMS-PMt005g13392) were present in the mitochondrial genomes of the three  
164 CMS lines. A single copy sequence of *orf193* (CMS-PMt002g06465) and a single copy sequence of  
165 STRG.39.1.p1 (*orf265*, CMS-PMt010g15739) were found in the mitochondrial genomes of the three  
166 CMS lines in addition to that of *S. acaule*. The presence of the three genes in the CMS lines was validated  
167 by a PCR assay with the three CMS lines and six fertile lines. The remaining six genes were found in  
168 both the CMS and fertile lines. We selected three genes, *orf137*, *orf193*, and *orf265*, as highly potential  
169 candidates for CMS-associated genes due to their presence specifically in the CMS mitochondrial  
170 genomes and their expression in anthers.

171

#### 172 *Sequence similarity analysis of the candidate genes*

173 The sequence similarity of the candidate genes including their flanking genome regions in the  
174 mitochondrial genome of ‘CMS[P]’ was investigated. A 3,045 bp genome sequence around *orf193*  
175 showed high sequence similarity to a 4,682 bp region of the tomato chloroplast genome sequences. The  
176 3,045 bp sequence was split into three sequences containing 1,590, 488, and 1,007 bp (Figure 5A) with  
177 highly conserved boundary sequences (Figure 5B). In the 1,590 bp chloroplast genome sequence, a gene  
178 encoding *cytochrome f* was encoded; however, the corresponding sequence in the mitochondrial genome  
179 had a single base insertion causing a frame-shift mutation (Figure 5C). This mutation broke the ORF of  
180 the *cytochrome f* gene and generated two small ORFs, *orf116* and *orf193*.

181 A portion of *orf265* and its upstream sequences (177 bp in total) showed high similarity to the *ATP*  
182 *synthase subunit 8 (atp8)* gene encoded in the tomato mitochondrial genome (Figure 5D). The remaining  
183 sequences of *orf265* lacked similarity to reported sequences. *orf265* was located upstream of the *nad3* and  
184 *rps12* genes in the mitochondrial genome. No sequence similarity was observed for *orf137* and the  
185 flanking sequence.

186

#### 187 *Expression analysis of the candidate genes*

188 The expression patterns of the candidate genes, *orf137*, *orf193*, and *orf265*, were investigated by RT-PCR.  
189 First, we validated the results of the transcriptome analysis by detecting expression of the three genes in  
190 anthers of ‘CMS[P]’ and ‘CMS[MSA1]’ (Figure 6A). *orf265* was tandemly arrayed with *nad3* and  
191 *rps12*; therefore, we assumed that these three genes were co-transcribed as an operon. As expected,  
192 transcripts spanning the three genes were also detected (Figure 6A). Next, we analyzed gene expression  
193 in leaves, stems, roots, ovaries, and pollen in addition to anthers of Dwarf ‘CMS[P]’ which was a BC3  
194 generation of ‘CMS[P]’ backcrossed with a tomato dwarf cultivar ‘Micro-Tom’. Expression of *orf137*  
195 and *orf265* was detected in all tested tissues, while that of *orf193* was observed in leaves, stems, roots,  
196 ovaries, and anthers (Figure 6B).

197

## 198 Discussion

199 We determined the mitochondrial and chloroplast genome sequences of CMS lines derived from  
200 asymmetric cell fusions and those of their nuclear and cytoplasmic donors (Table 1). Comparative  
201 analysis of the structures unexpectedly revealed that the cytoplasmic genome structures of the fusions  
202 were rearranged and divergent from those of the cytoplasmic donor (*S. acaule*) and nuclear donors (*S.*  
203 *lycopersicum*) (Figure 2). CMS-PMt003g09846 and CMS-PMt003g11185 were encoded in both the  
204 mitochondrial and chloroplast genomes (Table 2), suggesting that mitochondria and chloroplasts from the  
205 two donors were fused with each other and reorganized even though the cytoplasm of the nuclear donors  
206 was chemically inactivated to generate asymmetric cell fusions. Interestingly, the mitochondrial genomes  
207 of the CMS lines were larger than those of the donors, while the size of chloroplast genomes among the  
208 CMS lines were equivalent (Table 1). In addition, the structures of the mitochondrial genomes were  
209 divergent, while those of the chloroplast genomes were rather conserved (Figure 2). Gene clustering  
210 analysis suggested that both the cytoplasmic and nuclear donors contributed to form mitochondria in the  
211 CMS lines (Figure 3). Furthermore, the structures of the CMS mitochondrial genomes contained patches  
212 of the two genomes of the donors (Figure 4). These results suggest that the mitochondrial genomes of  
213 both donors were highly fragmented at the time of asymmetric cell fusion and reorganized to form a new  
214 mitochondrial genome<sup>5</sup>. This is completely different from our expectation that genomes of the  
215 cytoplasmic donors should be present in CMS lines derived from asymmetric cell fusions. More  
216 interestingly, chloroplasts of the CMS lines consisted only of genes from nuclear donors, not from the  
217 cytoplasmic donor. This unexpected finding has been frequently made in tomato<sup>17</sup>, tobacco<sup>18</sup>, and  
218 *Brassica*<sup>19</sup>. We speculate that interactions of genetic information between nuclei and organelles might be  
219 strict with chloroplasts rather than with mitochondria. The genome and/or organelle reorganization  
220 mechanisms after cell fusions might differ between mitochondria and chloroplasts.

221 Based on genome and transcriptome analyses, nine genes encoded in the mitochondrial genome of  
222 ‘CMS[P]’ were selected as candidate CMS-associated genes (Table 2). Among them, three genes  
223 (*orf193*, STRG.32.1.p1 = *orf137* and STRG.39.1.p1 = *orf265*) were uniquely present in the genomes of



224 the CMS lines and expressed in their anthers (Table 2 and Figure 6). STRG.32.1.p1 (*orf137*) showed  
225 sequence similarity with the CMS-associated protein encoding *cytochrome c subunit 1* (Figure 5).  
226 STRG.39.1.p1 (*orf265*) was similar to *ATP synthase subunit 8* at the N-terminus, but lacked similarity in  
227 the remaining regions (Figure 5). CMS-associated genes are generally involved in cellular respiration  
228 producing energy to generate pollen<sup>20</sup>, and this is true of both these genes. In many cases, fusion genes  
229 have been reported to be CMS-associated genes, e.g., *orf307* in *Oryza sativa*<sup>21</sup> and *orf72* in *Brassica*  
230 *oleracea*<sup>22</sup>, and to produce cytotoxic proteins, which lead to male sterility. Knockout mutagenesis with  
231 mitoTALENs<sup>14,15</sup> targeting the candidate genes would be useful to identify CMS-associated genes and to  
232 generate CMS lines from normal tomato cultivars.

233 CMS lines are powerful tools to produce F1 hybrid seeds in breeding programs<sup>1</sup>. However, in  
234 cereals and fruits including tomato, the *RF* genes are essential for F1 plants to set seeds and bear fruits.  
235 Restorer genes for CMS lines have been identified in wild tomato relatives, e.g., *S. pimpinellifolium*  
236 LA1670 and *S. lycopersicum* var. *cerasiforme* LA1673<sup>16</sup>. Recently, we published the genome sequence  
237 data of these two wild relatives<sup>23</sup>. We expect *RF* genes for CMS lines to be discovered soon based on this  
238 information, although no candidate genes or genetic loci have been reported. Once CMS-associated genes  
239 and restorer genes are identified, tomato F1 hybrid seeds can be produced by employing insect pollinators  
240 instead of the currently used hand-pollination systems. We propose that CMS-based F1 hybrid breeding  
241 programs with insect pollinators can be implemented in tomato breeding programs to reduce the costs of  
242 F1 seed production in the future.

243

## 244 **Materials and methods**

### 245 *Plant materials*

246 Three tomato CMS lines ('CMS[MSA1]', 'CMS[O]', and 'CMS[P]'), three cultivated tomato lines (*S.*  
247 *lycopersicum* 'Sekai-ichi', 'O', and 'P'), and one potato wild relative (*S. acaule*) were used (Figure 1).

248 'CMS[MSA1]' was developed by repeated backcrossing using 'O' as a recurrent parent and a  
249 male-sterile tomato, MSA1, as a cytoplasmic donor. MSA1 is an asymmetric cell fusion between the  
250 tomato cultivar Sekai-ichi (as the nuclear donor) and the potato wild relative *S. acaule* (as the cytoplasmic  
251 donor)<sup>4</sup>. 'CMS[O]' was a progeny in repeated backcrossing using 'O' as the paternal parent and an  
252 asymmetric cell fusion between 'O' (as the nuclear donor) and *S. acaule* (as the cytoplasmic donor).

253 'CMS[P]' was also a progeny in backcrossing using 'P' as the paternal parent and an asymmetric cell  
254 fusion between 'P' (as the nuclear donor) and *S. acaule* (as the cytoplasmic donor). Dwarf 'CMS[P]' was  
255 developed from 'CMS[P]' by backcrossing with *S. lycopersicum* 'Micro-Tom' (TOMJPF0001), which  
256 is a miniature dwarf cultivar<sup>24</sup>. The putative nuclear and cytoplasmic genomes of the materials are shown  
257 in Figure 1.

258

### 259 *Genome sequence analysis*



260 Total genomic DNA was extracted from young leaves of the six tomato lines ( ‘CMS[MSA1]’,  
261 ‘CMS[O]’, ‘CMS[P]’, ‘Sekai-ichi’, ‘O’, and ‘P’) and *S. acaule* with a Maxwell 16 Instrument and  
262 Maxwell 16 Tissue DNA Purification Kits (Promega, Madison, WI, USA). SMRT sequence libraries were  
263 constructed with an SMRTbell Express Template Prep Kit (PacBio, Menlo Park, CA, USA) and used for  
264 sequencing on a PacBio Sequel system (PacBio). Genome sequence data for *S. pimpinellifolium* LA1670  
265 and *S. lycopersicum* var. *cerasiforme* LA1673 were obtained from a public DNA database (DRA  
266 accession numbers DRX231405 and DRX231409)<sup>23</sup>.

267

#### 268 *Genome assembly and gene prediction*

269 Sequence reads were mapped on reference genome sequences for mitochondria (GenBank accession  
270 numbers MF034192, MF034193, NC\_035964, and MF98995–MF989957) or chloroplasts (NC\_007898)  
271 with Organelle\_PBA<sup>25</sup>. Reads mapped on the reference sequences were assembled into contig sequences  
272 with Canu<sup>26</sup>. Potential sequence errors in the contig sequences were corrected twice with the sequence  
273 reads by Arrow (PacBio). The corrected contig sequences were aligned back to the reference sequences  
274 with Nucmer<sup>27</sup> to select highly confident organelle genomes. ORFs ( $\geq 75$  bases) in the organelle genomes  
275 were selected as potential genes with ORFfinder (<https://www.ncbi.nlm.nih.gov/orffinder>). The ORF  
276 sequences were clustered with CD-HIT<sup>28</sup>. Transmembrane domains in the gene sequences were predicted  
277 by TMHMM<sup>29</sup>. Sequence similarity searches with the mitochondrial genomes of *S. pennellii*  
278 (NC\_035964) and *N. tabacum* (NC\_006581) were performed by BLAST<sup>30</sup> with a threshold E-value of  
279 1e-50.

280

#### 281 *RNA expression analysis*

282 Total RNA was extracted from the anthers of P and ‘CMS[P]’ with an RNeasy Plant Mini Kit (QIAGEN,  
283 Hilden, Germany). RNA was treated with RNase-free DNase (QIAGEN) and used for sequence library  
284 preparation with a TruSeq Stranded mRNA Library Prep Kit (Illumina, San Diego, CA, USA). The  
285 resultant libraries were sequenced on NextSeq500 (Illumina) in paired-end, 151 bp mode. After trimming  
286 adaptors and low-quality reads by Trim\_galore (<https://github.com/FelixKrueger/TrimGalore>) with option  
287 -q 30 --length 100 followed by fastp<sup>31</sup> with option -l 100, transcriptomes were *de novo* assembled by the  
288 HiSat2-Stringtie pipeline<sup>32</sup> and putative ORFs were searched for annotation by BLASTP<sup>30</sup> against the  
289 SWISS-PROT database<sup>33</sup>.

290 To validate the RNA-Seq results, RT-PCR was performed. In total, 800 ng of total RNA isolated  
291 from anthers of the CMS lines or seedlings of *S. acaule* was converted into cDNA with ReverTra Ace  
292 (TOYOBO, Osaka, Japan) using a random primer (TAKARA BIO, Kusatsu, Japan). cDNA diluted  
293 10-fold with water was used as a template for PCR. The PCR mixture (10  $\mu$ L) contained 0.5  $\mu$ L cDNA,  
294 0.3  $\mu$ M primers (Table 3), 2 $\times$  PCR buffer (TOYOBO), 400  $\mu$ M dNTPs, and 1 U DNA polymerase (KOD  
295 FX Neo, TOYOBO). The thermal cycling conditions were as follows: initial denaturation at 94°C for 3

296 min; 35 cycles of denaturation at 98°C for 15 s, annealing at 60°C for 30 s, and extension at 68°C for 60 s;  
297 and a final extension at 68°C for 3 min. PCR products were separated by electrophoresis in a 1% agarose  
298 gel with TAE buffer. Gels were stained with Midori Green Advance (NIPPON Genetics, Tokyo, Japan) to  
299 detect DNA bands under ultraviolet illumination.

300

#### 301 **Data availability**

302 The DDBJ accession numbers of the assembled sequences are LC613090-LC613141. Genome  
303 information is available at KaTomicsDB (<http://www.kazusa.or.jp/tomato>).

304

#### 305 **Acknowledgments**

306 We are grateful to Prof. Kazuo Watanabe (University of Tsukuba, Japan) for providing the DNA material  
307 of *S. acaule*. This work was supported by the Kazusa DNA Research Institute Foundation and the Project  
308 of the NARO Bio-oriented Technology Research Advancement Institution (Research Program on  
309 Development of Innovative Technology, Grant number: 30010A). Seeds of Micro-Tom (TOMJPF0001)  
310 was provided from National BioResource Project Tomato (NBRP tomato).

311

#### 312 **Conflicts of interest**

313 YM is an employee of TOKITA Seed Co. LTD. All other authors declare no competing interests.

314

#### 315 **Contributions**

316 TA and KS conceived and coordinated the project. YM established the plant materials. KK, IH, and KS  
317 collected the data. KK, IH, TA, and KS analyzed and interpreted the data. KK and KS wrote the  
318 manuscript with contributions from TA. All authors read and approved the final manuscript.

319

#### 320 **References**

- 321 1. Bohra, A., Jha, U.C., Adhimoolam, P., Bisht, D. & Singh, N.P. Cytoplasmic male sterility (CMS)  
322 in hybrid breeding in field crops. *Plant Cell Rep* **35**, 967-93  
323 <http://dx.doi.org/10.1007/s00299-016-1949-3> (2016).
- 324 2. Petrova, M. *et al.* Characterisation of a cytoplasmic male-sterile hybrid line between  
325 *Lycopersicon peruvianum* Mill. × *Lycopersicon pennellii* Corr. and its crosses with cultivated  
326 tomato. *Theoretical and Applied Genetics* **98**, 825-830 <http://dx.doi.org/10.1007/s001220051139>  
327 (1999).
- 328 3. Sandhu, A.P., Abdelnoor, R.V. & Mackenzie, S.A. Transgenic induction of mitochondrial  
329 rearrangements for cytoplasmic male sterility in crop plants. *Proc Natl Acad Sci U S A* **104**,  
330 1766-70 <http://dx.doi.org/10.1073/pnas.0609344104> (2007).
- 331 4. Melchers, G., Mohri, Y., Watanabe, K., Wakabayashi, S. & Harada, K. One-step generation of

- 332 cytoplasmic male sterility by fusion of mitochondrial-inactivated tomato protoplasts with  
333 nuclear-inactivated *Solanum* protoplasts. *Proc Natl Acad Sci U S A* **89**, 6832-6  
334 <http://dx.doi.org/10.1073/pnas.89.15.6832> (1992).
- 335 5. Shikanai, T., Kaneko, H., Nakata, S., Harada, K. & Watanabe, K. Mitochondrial genome  
336 structure of a cytoplasmic hybrid between tomato and wild potato. *Plant Cell Rep* **17**, 832-836  
337 <http://dx.doi.org/10.1007/s002990050493> (1998).
- 338 6. Shikanai, T., Nakata, S., Harada, K. & Watanabe, K. Analysis of the heterogeneous transcripts of  
339 the highly edited orf206 in tomato mitochondria. *Plant Cell Physiol* **37**, 692-6  
340 <http://dx.doi.org/10.1093/oxfordjournals.pcp.a029000> (1996).
- 341 7. Chen, L. & Liu, Y.G. Male sterility and fertility restoration in crops. *Annu Rev Plant Biol* **65**,  
342 579-606 <http://dx.doi.org/10.1146/annurev-arplant-050213-040119> (2014).
- 343 8. Igarashi, K., Kazama, T., Motomura, K. & Toriyama, K. Whole genomic sequencing of RT98  
344 mitochondria derived from *Oryza rufipogon* and northern blot analysis to uncover a cytoplasmic  
345 male sterility-associated gene. *Plant Cell Physiol* **54**, 237-43  
346 <http://dx.doi.org/10.1093/pcp/pcs177> (2013).
- 347 9. Okazaki, M., Kazama, T., Murata, H., Motomura, K. & Toriyama, K. Whole mitochondrial  
348 genome sequencing and transcriptional analysis to uncover an RT102-type cytoplasmic male  
349 sterility-associated candidate Gene Derived from *Oryza rufipogon*. *Plant Cell Physiol* **54**,  
350 1560-8 <http://dx.doi.org/10.1093/pcp/pct102> (2013).
- 351 10. Makarenko, M.S. *et al.* Characterization of the mitochondrial genome of the MAX1 type of  
352 cytoplasmic male-sterile sunflower. *BMC Plant Biol* **19**, 51  
353 <http://dx.doi.org/10.1186/s12870-019-1637-x> (2019).
- 354 11. Li, S. *et al.* The comparison of four mitochondrial genomes reveals cytoplasmic male sterility  
355 candidate genes in cotton. *BMC Genomics* **19**, 775 <http://dx.doi.org/10.1186/s12864-018-5122-y>  
356 (2018).
- 357 12. Wu, Z. *et al.* Mitochondrial genome and transcriptome analysis of five alloplasmic male-sterile  
358 lines in *Brassica juncea*. *BMC Genomics* **20**, 348 <http://dx.doi.org/10.1186/s12864-019-5721-2>  
359 (2019).
- 360 13. Yang, J., Liu, X., Yang, X. & Zhang, M. Mitochondrially-targeted expression of a cytoplasmic  
361 male sterility-associated orf220 gene causes male sterility in *Brassica juncea*. *BMC Plant Biol* **10**,  
362 231 <http://dx.doi.org/10.1186/1471-2229-10-231> (2010).
- 363 14. Kazama, T. *et al.* Curing cytoplasmic male sterility via TALEN-mediated mitochondrial genome  
364 editing. *Nat Plants* **5**, 722-730 <http://dx.doi.org/10.1038/s41477-019-0459-z> (2019).
- 365 15. Arimura, S.I. *et al.* Targeted gene disruption of ATP synthases 6-1 and 6-2 in the mitochondrial  
366 genome of *Arabidopsis thaliana* by mitoTALENs. *Plant J* **104**, 1459-1471  
367 <http://dx.doi.org/10.1111/tpj.15041> (2020).

- 368 16. Harada, K., Kondo, K. & Watabe, K. Creation of fl tomato plant recovered in fertility. (1995).
- 369 17. Bonnema, A.B., Melzer, J.M. & O'Connell, M.A. Tomato cybrids with mitochondrial DNA from  
370 *Lycopersicon pennelli*. *Theor Appl Genet* **81**, 339-48 <http://dx.doi.org/10.1007/BF00228674>  
371 (1991).
- 372 18. Sidorov, V.A., Menczel, L., Nagy, F. & Maliga, P. Chloroplast transfer in *Nicotiana* based on  
373 metabolic complementation between irradiated and iodoacetate treated protoplasts. *Planta* **152**,  
374 341-5 <http://dx.doi.org/10.1007/BF00388259> (1981).
- 375 19. Morgan, A. & Maliga, P. Rapid chloroplast segregation and recombination of mitochondrial  
376 DNA in *Brassica* cybrids. *Mol Gen Genet* **209**, 240-6 <http://dx.doi.org/10.1007/BF00329649>  
377 (1987).
- 378 20. Touzet, P. & Meyer, E.H. Cytoplasmic male sterility and mitochondrial metabolism in plants.  
379 *Mitochondrion* **19 Pt B**, 166-71 <http://dx.doi.org/10.1016/j.mito.2014.04.009> (2014).
- 380 21. Fujii, S., Kazama, T., Yamada, M. & Toriyama, K. Discovery of global genomic re-organization  
381 based on comparison of two newly sequenced rice mitochondrial genomes with cytoplasmic  
382 male sterility-related genes. *BMC Genomics* **11**, 209 <http://dx.doi.org/10.1186/1471-2164-11-209>  
383 (2010).
- 384 22. Shinada, T., Kikuchi, Y., Fujimoto, R. & Kishitani, S. An alloplasmic male-sterile line of  
385 *Brassica oleracea* harboring the mitochondria from *Diplotaxis muralis* expresses a novel  
386 chimeric open reading frame, orf72. *Plant Cell Physiol* **47**, 549-53  
387 <http://dx.doi.org/10.1093/pcp/pcj014> (2006).
- 388 23. Takei, H. *et al.* De novo genome assembly of two tomato ancestors, *solanum pimpinellifolium*  
389 and *S. lycopersicum* var. *cerasiforme*, by long-read sequencing. *DNA Res*  
390 <http://dx.doi.org/10.1093/dnares/dsaa029> (2021).
- 391 24. Scott, J.W. & Harbaugh, B.K. *Micro-tom: A Miniature Dwarf Tomato* (Agricultural Experiment  
392 Station, Institute of Food and Agricultural Sciences, University of Florida, 1989).
- 393 25. Soorni, A., Haak, D., Zaitlin, D. & Bombarely, A. Organelle\_PBA, a pipeline for assembling  
394 chloroplast and mitochondrial genomes from PacBio DNA sequencing data. *BMC Genomics* **18**,  
395 49 <http://dx.doi.org/10.1186/s12864-016-3412-9> (2017).
- 396 26. Koren, S. *et al.* Canu: scalable and accurate long-read assembly via adaptive k-mer weighting  
397 and repeat separation. *Genome Res* **27**, 722-736 <http://dx.doi.org/10.1101/gr.215087.116> (2017).
- 398 27. Kurtz, S. *et al.* Versatile and open software for comparing large genomes. *Genome Biol* **5**, R12  
399 <http://dx.doi.org/10.1186/gb-2004-5-2-r12> (2004).
- 400 28. Fu, L., Niu, B., Zhu, Z., Wu, S. & Li, W. CD-HIT: accelerated for clustering the next-generation  
401 sequencing data. *Bioinformatics* **28**, 3150-2 <http://dx.doi.org/10.1093/bioinformatics/bts565>  
402 (2012).
- 403 29. Krogh, A., Larsson, B., von Heijne, G. & Sonnhammer, E.L. Predicting transmembrane protein

- 404 topology with a hidden Markov model: application to complete genomes. *J Mol Biol* **305**,  
405 567-80 <http://dx.doi.org/10.1006/jmbi.2000.4315> (2001).
- 406 30. Altschul, S.F. *et al.* Gapped BLAST and PSI-BLAST: a new generation of protein database  
407 search programs. *Nucleic Acids Res* **25**, 3389-402 <http://dx.doi.org/10.1093/nar/25.17.3389>  
408 (1997).
- 409 31. Chen, S., Zhou, Y., Chen, Y. & Gu, J. fastp: an ultra-fast all-in-one FASTQ preprocessor.  
410 *Bioinformatics* **34**, i884-i890 <http://dx.doi.org/10.1093/bioinformatics/bty560> (2018).
- 411 32. Pertea, M., Kim, D., Pertea, G.M., Leek, J.T. & Salzberg, S.L. Transcript-level expression  
412 analysis of RNA-seq experiments with HISAT, StringTie and Ballgown. *Nat Protoc* **11**, 1650-67  
413 <http://dx.doi.org/10.1038/nprot.2016.095> (2016).
- 414 33. Bairoch, A. & Apweiler, R. The SWISS-PROT protein sequence database and its supplement  
415 TrEMBL in 2000. *Nucleic Acids Res* **28**, 45-8 <http://dx.doi.org/10.1093/nar/28.1.45> (2000).
- 416
- 417

418 **Figure legends**

419 **Figure 1** Pedigree of the CMS tomato lines.

420 Squares and circles indicate cytoplasm and nuclei, respectively. Arrows with dashed lines and doubled  
421 lines indicate cell fusions and crossings, respectively.

422 **Figure 2** Comparative maps of the organelle genomes of the CMS tomato lines.

423 Mitochondrial (A) and chloroplast (B) genomes of the three CMS lines, nuclear donors, and cytoplasmic  
424 donor. Dots indicate sequence similarity between the genome sequences.

425 **Figure 3** Organelle genes in the CMS lines, nuclear donors, and cytoplasmic donor.

426 Numbers of genes unique to the CMS lines, nuclear donors, and cytoplasmic donor are indicated in bold,  
427 standard, and italic fonts, respectively. Percentages of genes are shown in parentheses.

428 **Figure 4** Distributions of CMS tomato genes across the organelle genomes.

429 Dots indicate gene positions on contig sequences of the organelle genomes. Genes are grouped into the  
430 following four types: Type 1, genes unique to the CMS lines; Type 2, genes shared with the nuclear  
431 donors; Type 3, genes shared with the cytoplasmic donor; and Type 4, genes shared with both the nuclear  
432 and cytoplasmic donors.

433 **Figure 5** Structures of mitochondrial genes in ‘CMS[P]’.

434 A. Genome structure of the *orf193* region. Homologous sequences between the two genomes are  
435 indicated by gray boxes. Highly conserved sequences at the borders are shown in red and blue. B.

436 Sequence alignments of the borders. C. Details of the genome structure of the *orf193* region. A single  
437 nucleotide insertion causing a frame-shift mutation is indicated with a red arrow. D. Genome structure of  
438 the *orf265* region.

439 **Figure 6** RT-PCR analysis of the CMS-associated gene candidates.

440 Gene expression patterns in anthers of two CMS lines (A) and in seven samples of Dwarf ‘CMS[P]’ (B).  
441 *cox2* is a positive control.

442

443 **Table 1** Assembly data of the organelle genomes.

| Organelle            | Male sterile |         |         | Male fertile   |         |         |                   |                                       |         |
|----------------------|--------------|---------|---------|----------------|---------|---------|-------------------|---------------------------------------|---------|
|                      | CMS lines    |         |         | Nuclear donors |         |         | Cytoplasmic donor | Tomato wild relative and weedy tomato |         |
|                      | CMS[MSA1]    | CMS[O]  | CMS[P]  | Sekai-ichi     | O       | P       | <i>S. acaule</i>  | LA1670                                | LA1673  |
| <b>Mitochondrion</b> |              |         |         |                |         |         |                   |                                       |         |
| Number of sequences  | 7            | 7       | 5       | 2              | 2       | 2       | 7                 | 3                                     | 2       |
| Total length (bp)    | 995,217      | 968,425 | 829,310 | 562,630        | 536,932 | 553,289 | 728,387           | 620,567                               | 569,852 |
| Number of genes      | 19,170       | 18,623  | 15,912  | 10,782         | 10,326  | 10,653  | 13,898            | 11,920                                | 10,965  |
| <b>Chloroplast</b>   |              |         |         |                |         |         |                   |                                       |         |
| Number of sequences  | 1            | 1       | 3       | 2              | 2       | 2       | 1                 | 1                                     | 2       |
| Total length (bp)    | 296,583      | 307,105 | 454,083 | 389,209        | 349,506 | 346,936 | 284,040           | 299,393                               | 337,655 |
| Number of genes      | 5,279        | 5,456   | 8,165   | 6,971          | 6,267   | 6,192   | 5,130             | 5,346                                 | 5,995   |

444



445 **Table 2** Copy numbers of CMS-associated gene candidates in the organelle genomes.

| Gene ID of CMS[PF]                                       | Candidates from genome analysis | Candidates from transcriptome analysis | Copy number in mitochondrial genome |        |        |            |   |   |                 | Copy number in chloroplast genome |        |        |            |   |   |                 |
|----------------------------------------------------------|---------------------------------|----------------------------------------|-------------------------------------|--------|--------|------------|---|---|-----------------|-----------------------------------|--------|--------|------------|---|---|-----------------|
|                                                          |                                 |                                        | CMS[MSAI]                           | CMS[O] | CMS[P] | Sekai-ichi | O | P | <i>S. acule</i> | CMS[MSAI]                         | CMS[O] | CMS[P] | Sekai-ichi | O | P | <i>S. acule</i> |
| CMS-PMt002g06465                                         | <i>orf193</i>                   |                                        | 1                                   | 1      | 1      | 0          | 0 | 0 | 1               | 0                                 | 0      | 0      | 0          | 0 | 0 | 0               |
| CMS-PMt002g07240 and CMS-PMt005g13392                    | <i>orf137</i>                   | STRG.32.1.p1                           | 2                                   | 2      | 2      | 0          | 0 | 0 | 0               | 0                                 | 0      | 0      | 0          | 0 | 0 | 0               |
| CMS-PMt002g07993, CMS-PMt003g11130, and CMS-PMt004g12510 |                                 | STRG.22.1.p1                           | 1                                   | 1      | 3      | 1          | 1 | 1 | 1               | 0                                 | 0      | 0      | 0          | 0 | 0 | 0               |
| CMS-PMt003g09515                                         |                                 | STRG.5.1.p1                            | 0                                   | 0      | 1      | 0          | 0 | 0 | 0               | 0                                 | 0      | 0      | 0          | 0 | 0 | 0               |
| CMS-PMt003g09846                                         |                                 | STRG.8.1.p1                            | 0                                   | 0      | 1      | 0          | 0 | 0 | 0               | 1                                 | 1      | 3      | 2          | 1 | 2 | 1               |
| CMS-PMt003g11185                                         |                                 | STRG.18.1.p1                           | 0                                   | 0      | 1      | 0          | 0 | 0 | 0               | 2                                 | 2      | 3      | 1          | 2 | 2 | 2               |
| CMS-PMt010g15327 and CMS-PMt010g15548                    |                                 | STRG.31.1.p1                           | 2                                   | 2      | 2      | 0          | 1 | 1 | 1               | 0                                 | 0      | 0      | 0          | 0 | 0 | 0               |
| CMS-PMt010g15739                                         | <i>orf265</i>                   | STRG.39.1.p1                           | 1                                   | 1      | 1      | 0          | 0 | 0 | 1               | 0                                 | 0      | 0      | 0          | 0 | 0 | 0               |
| CMS-PMt010g15740                                         |                                 | STRG.39.1.p3                           | 1                                   | 1      | 1      | 1          | 1 | 1 | 1               | 0                                 | 0      | 0      | 0          | 0 | 0 | 0               |

446

447

448 **Table 3** Oligonucleotide sequences of PCR primers

| Target gene         | Forward primer (5' - 3') | Reverse primer (5' - 3') |
|---------------------|--------------------------|--------------------------|
| <i>orf137</i>       | CGATTGAGAAAGCGGCAGGC     | GTTATTTTCGCTGCAACGGCG    |
| <i>orf193</i>       | GGGGAATCGGCCTTCTTTAGTC   | GGGGAGGGTTTAATAAAGGAGCTG |
| <i>orf265</i>       | CGGAGTGAAGCTGTATTGAGGG   | GAGGAGAGGAACGAAGAACGAAAC |
| <i>orf265-rps12</i> | CGGAGTGAAGCTGTATTGAGGG   | GATCCGGAATTCCCAGCAAATCC  |
| <i>cox2</i>         | CCCGCAAAGGATTGTTTCATGG   | CGTATAGGGCTCTTTGCTGGTAG  |

449

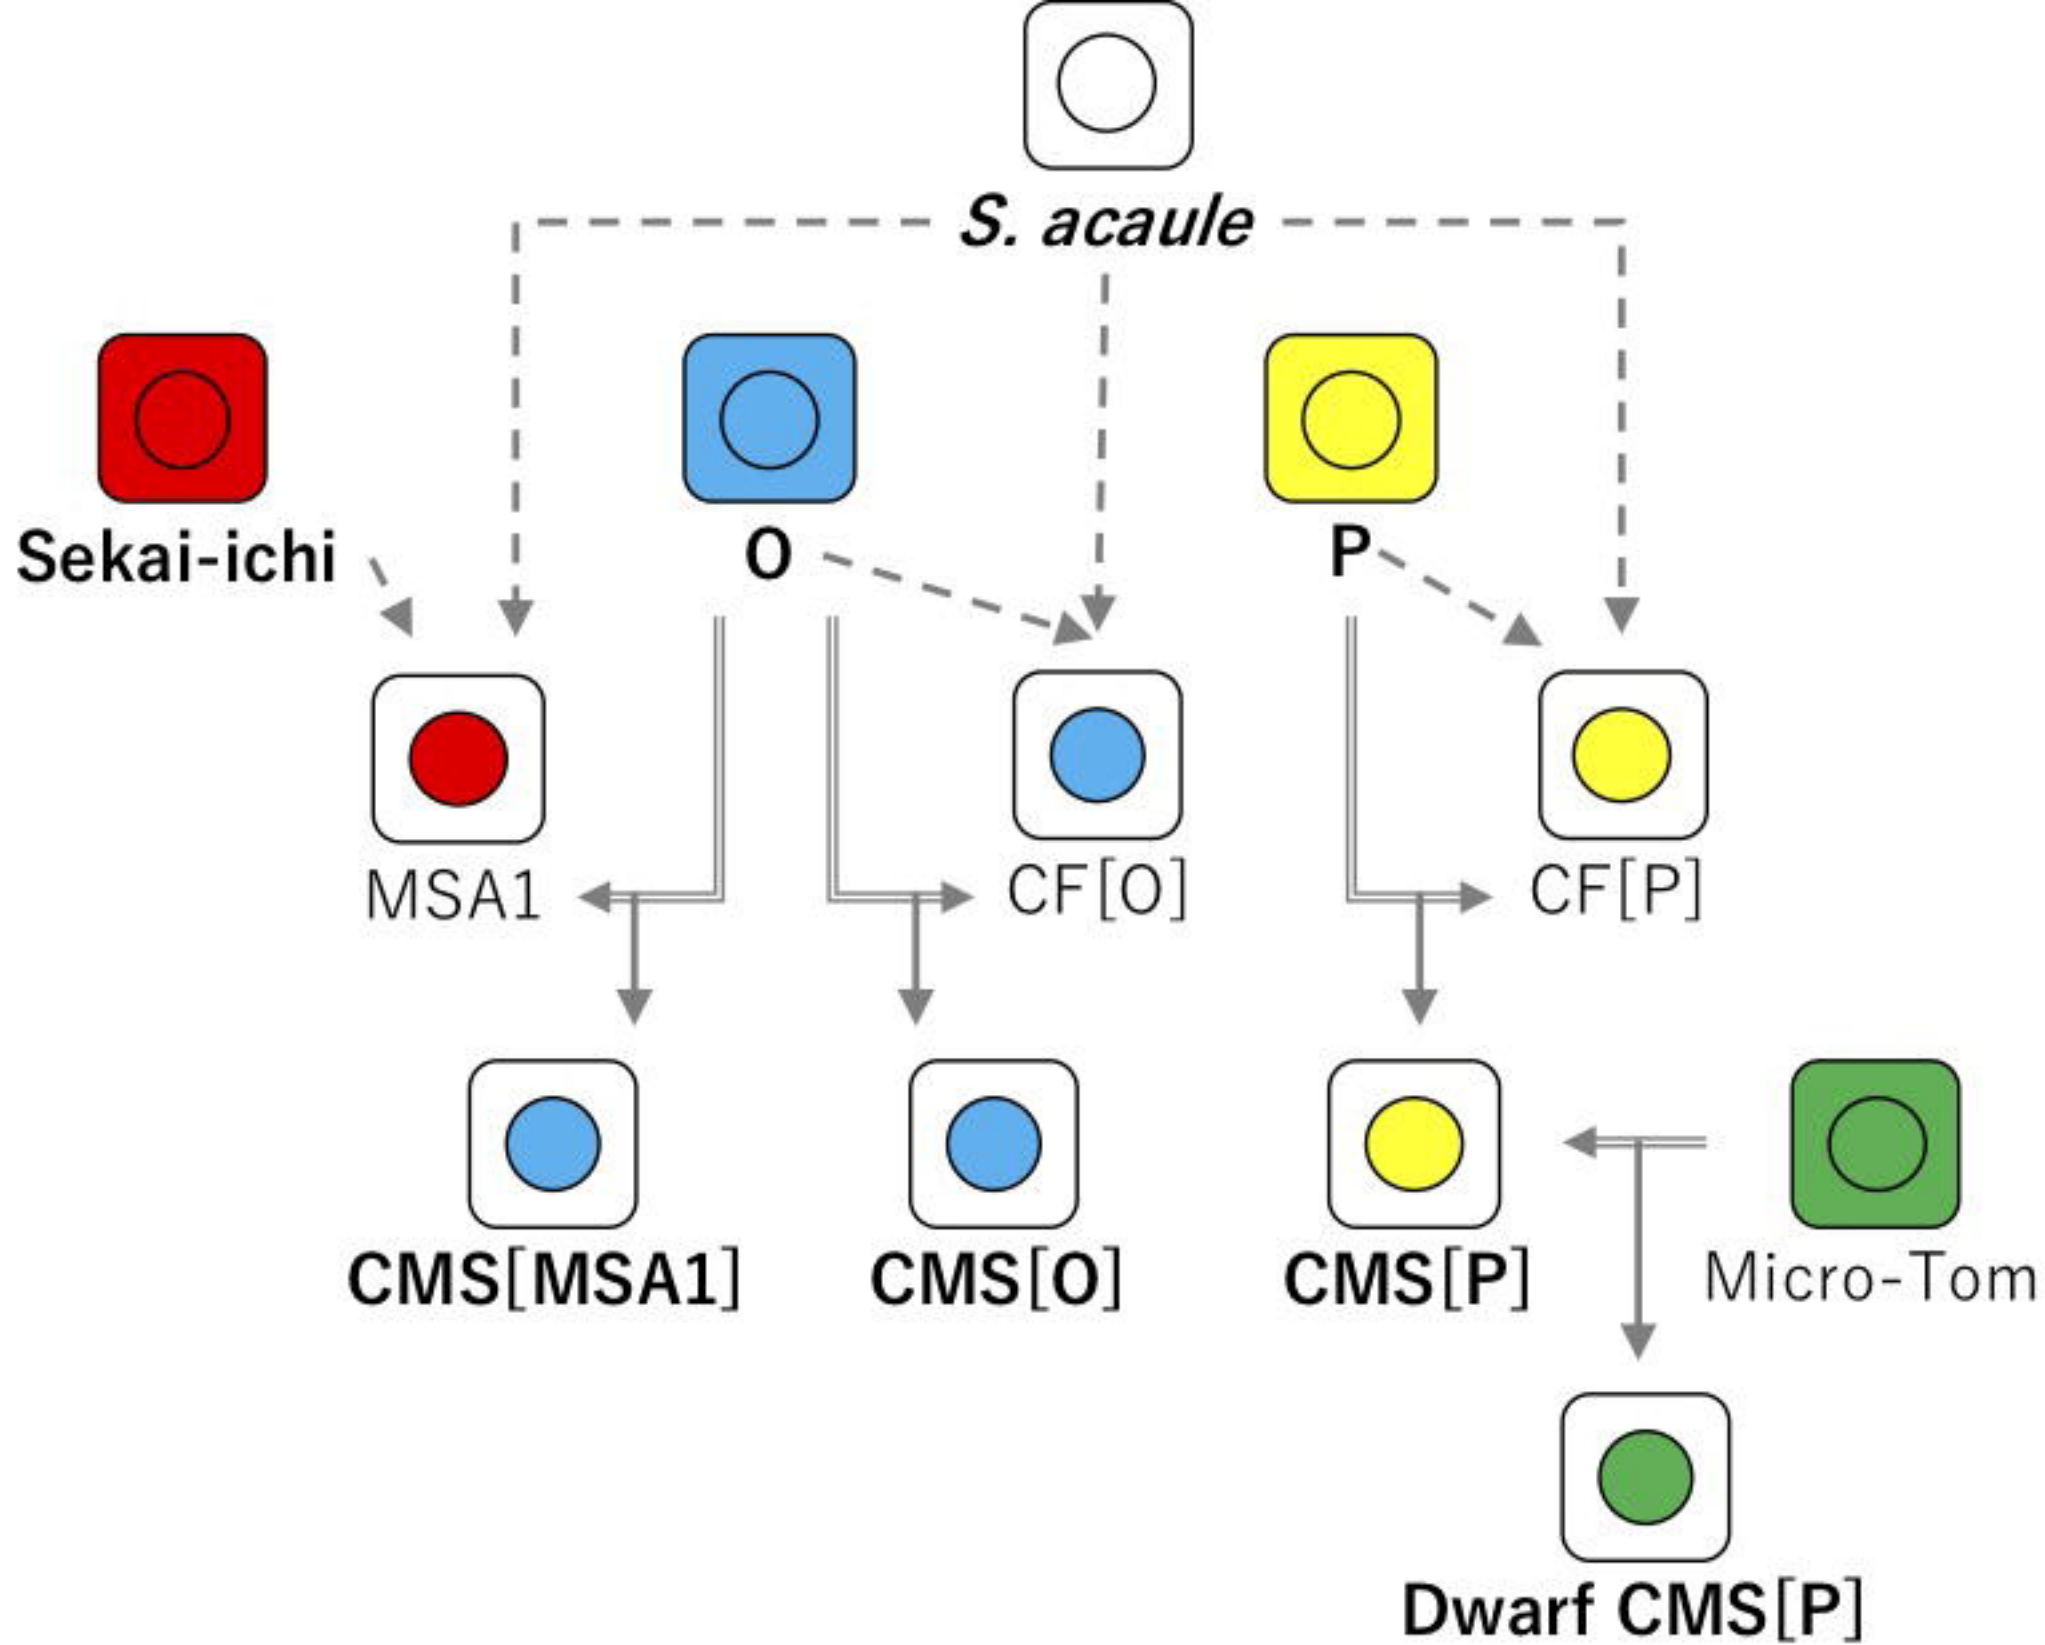

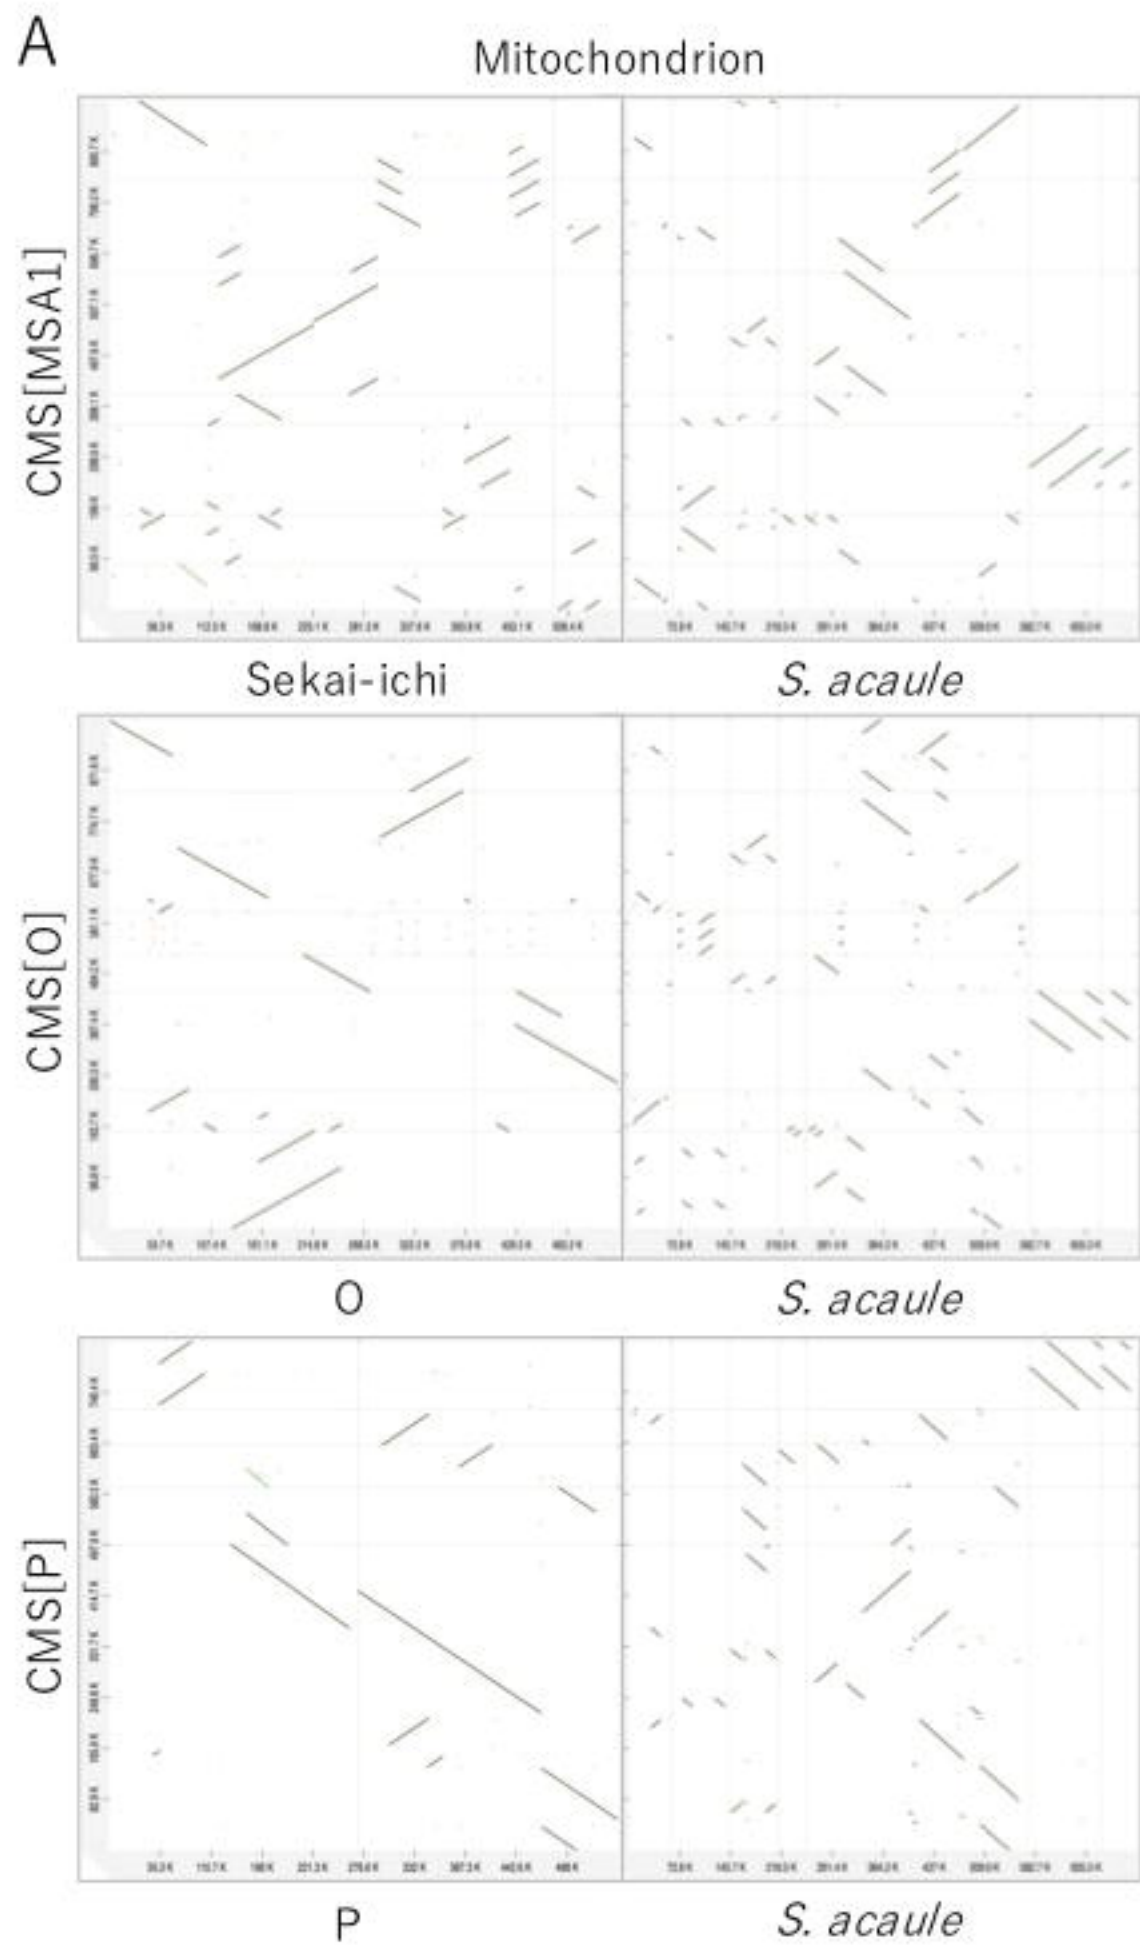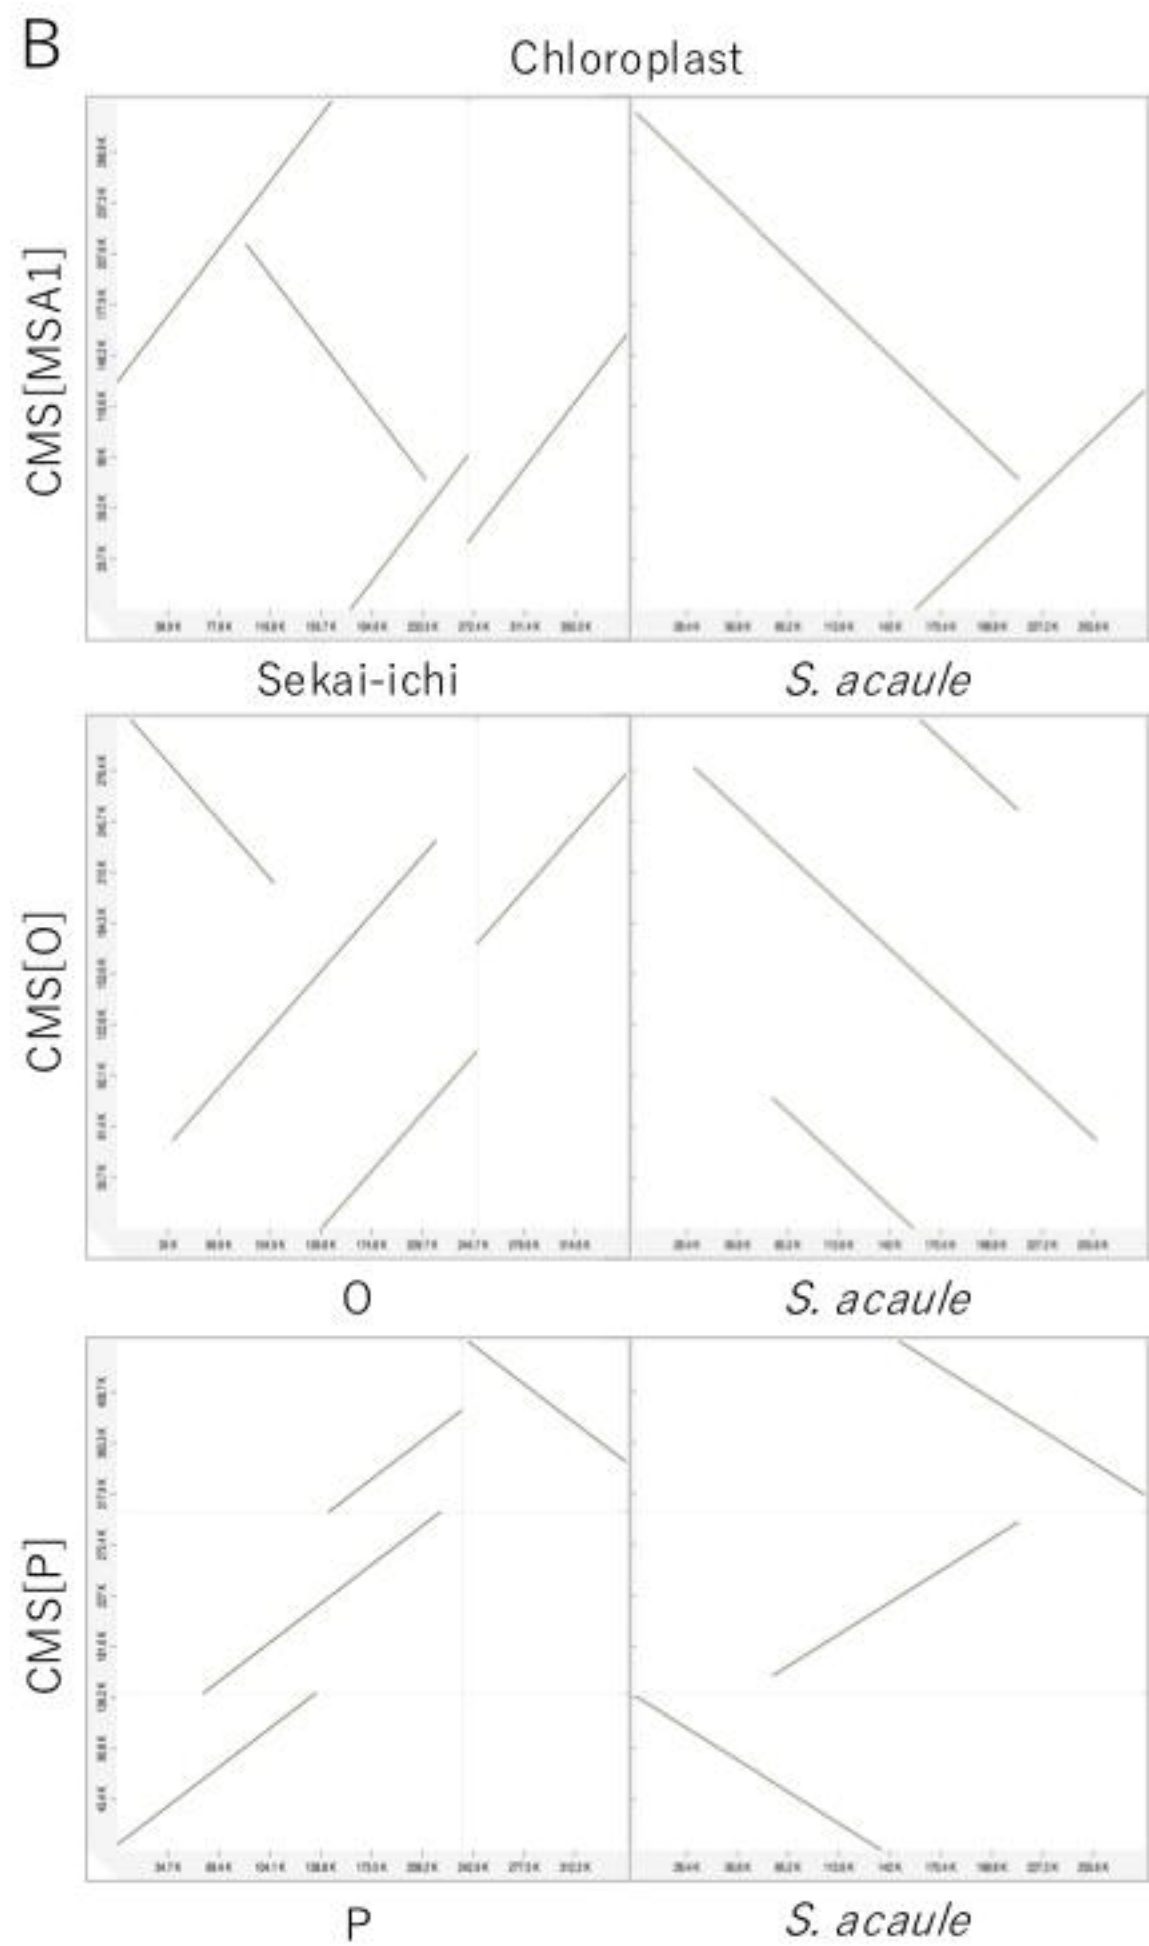

**CMS[MSA1]**

**CMS[MSA1]**

bioRxiv preprint doi: <https://doi.org/10.1101/2021.03.03.433741>; this version posted March 4, 2021. The copyright holder for this preprint (which was not certified by peer review) is the author/funder, who has granted bioRxiv a license to display the preprint in perpetuity. It is made available under aCC-BY 4.0 International license.

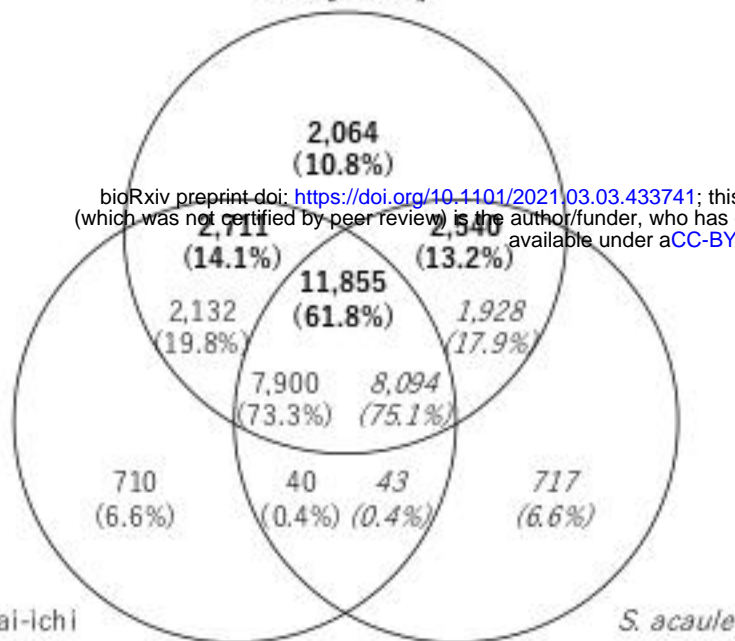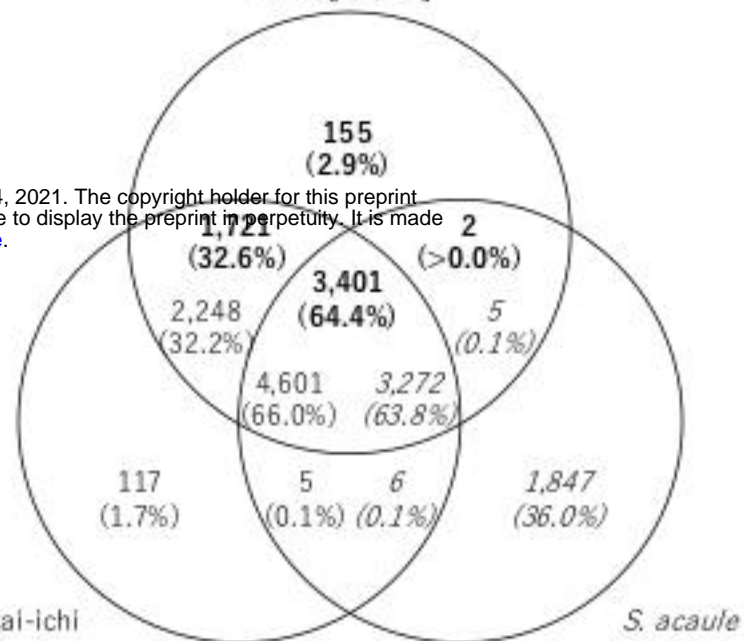

**CMS[O]**

**CMS[O]**

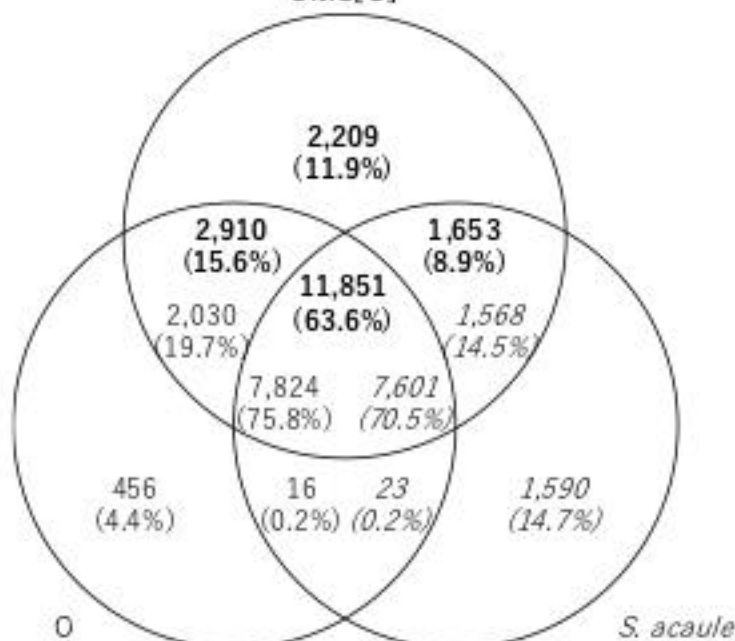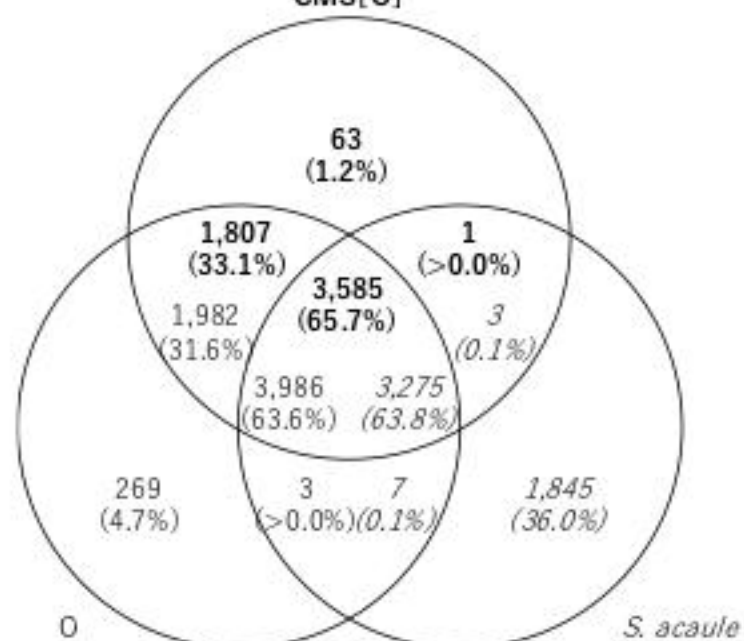

**CMS[P]**

**CMS[P]**

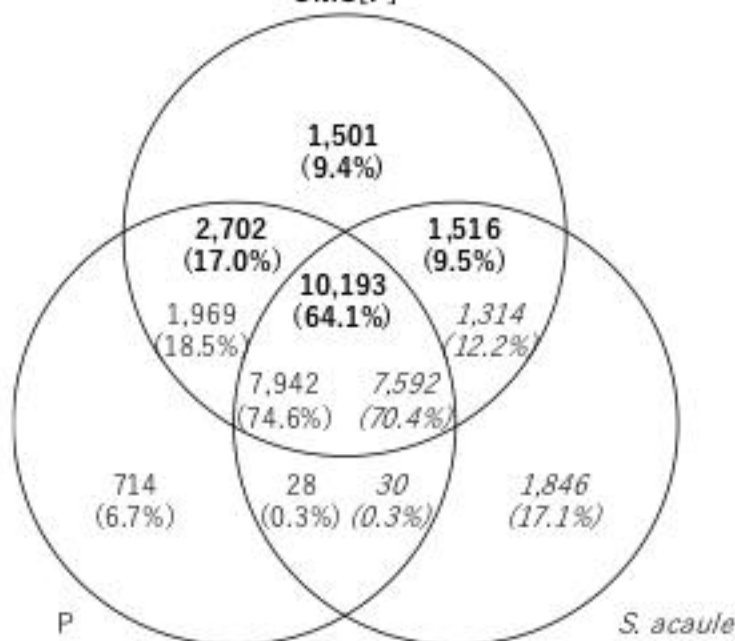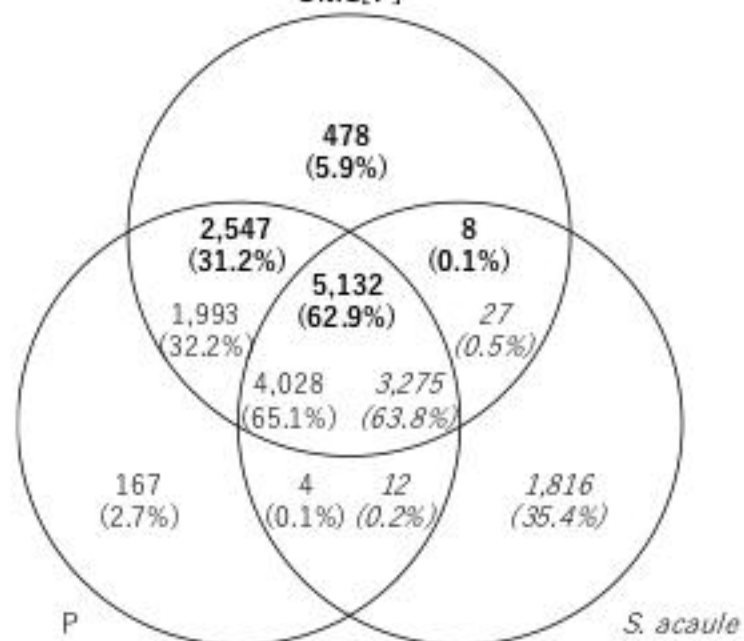

Mitochondrion

Chloroplast

**CMS[MSA1] Mt genome**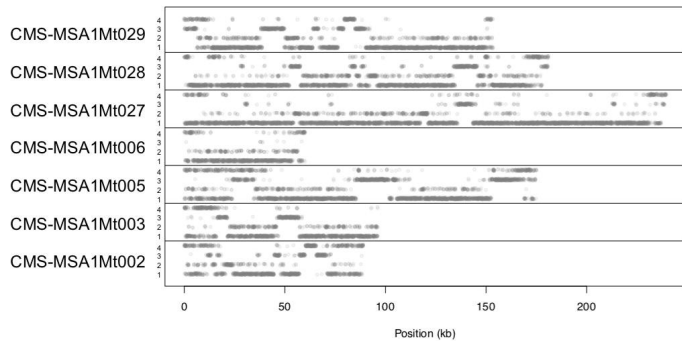**CMS[MSA1] Cp genome**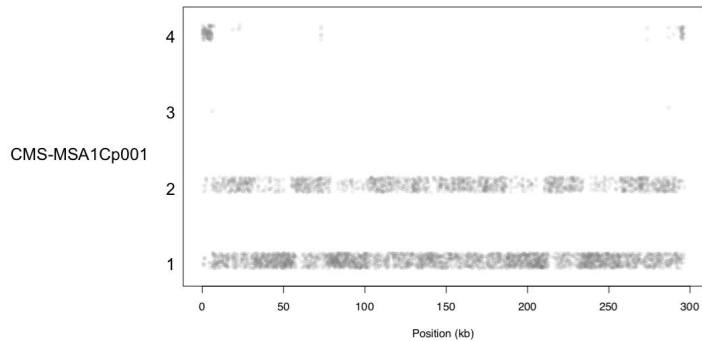**CMS[O] Mt genome**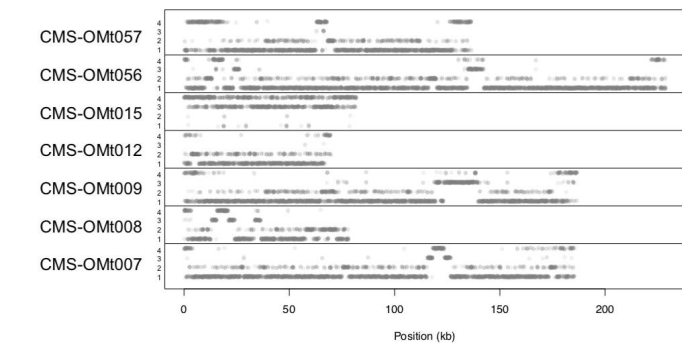**CMS[O] Cp genome**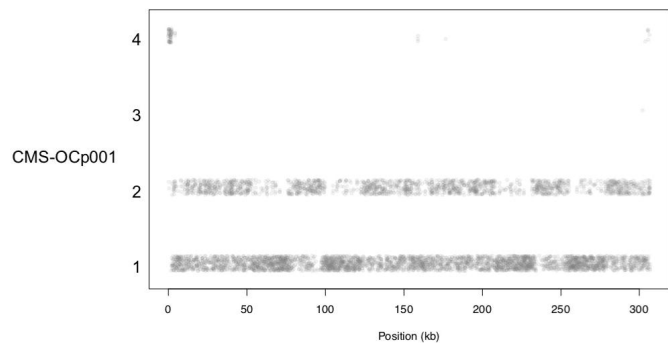**CMS[P] Mt genome**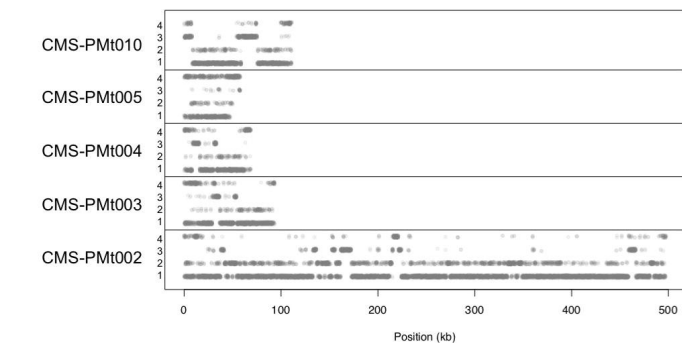**CMS[P] Cp genome**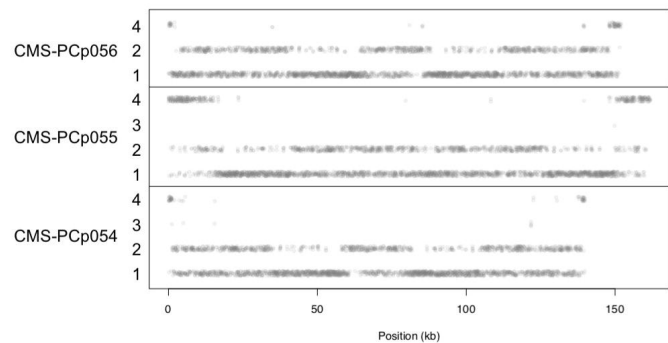



**A**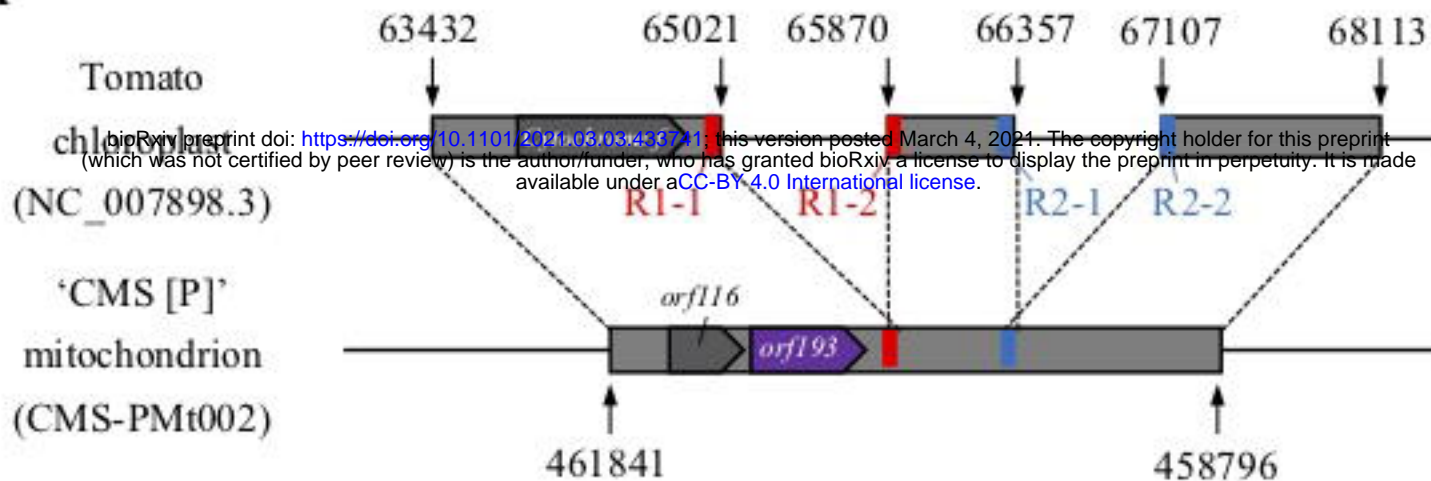**B**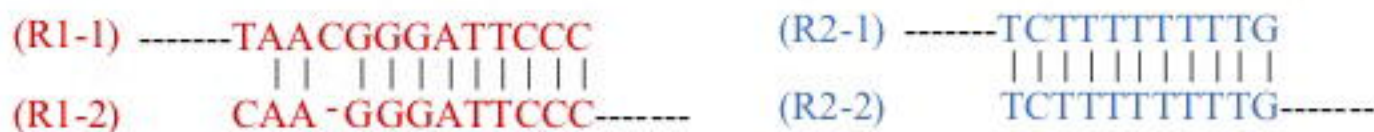**C**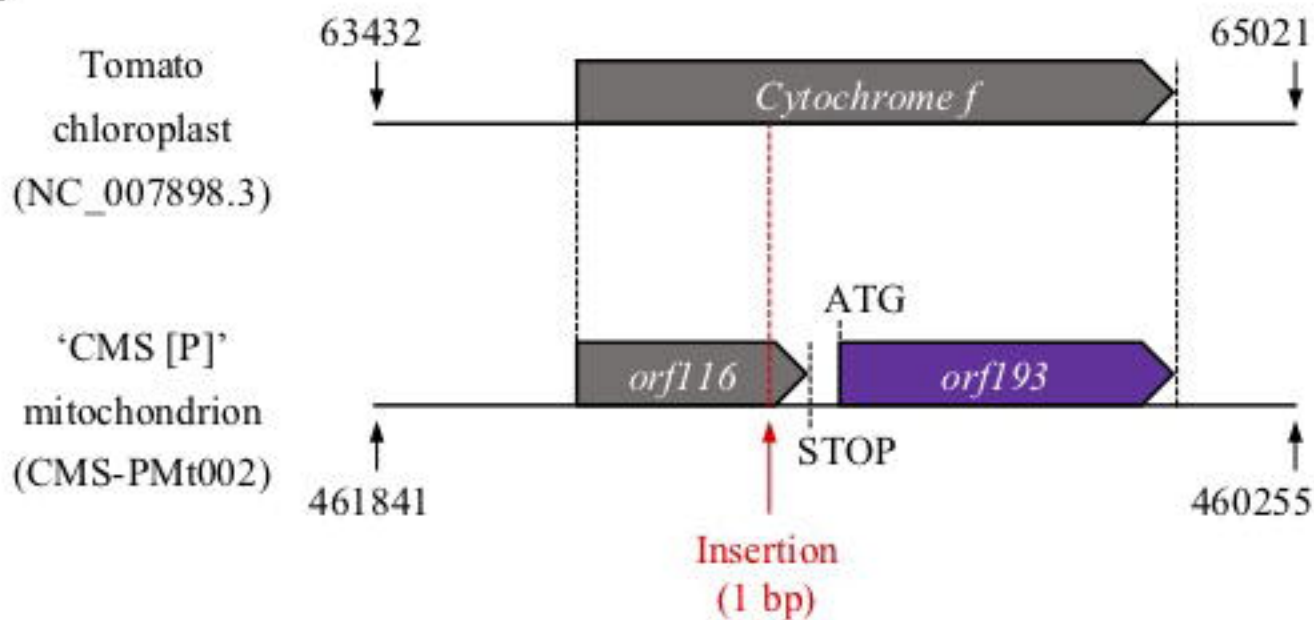**D**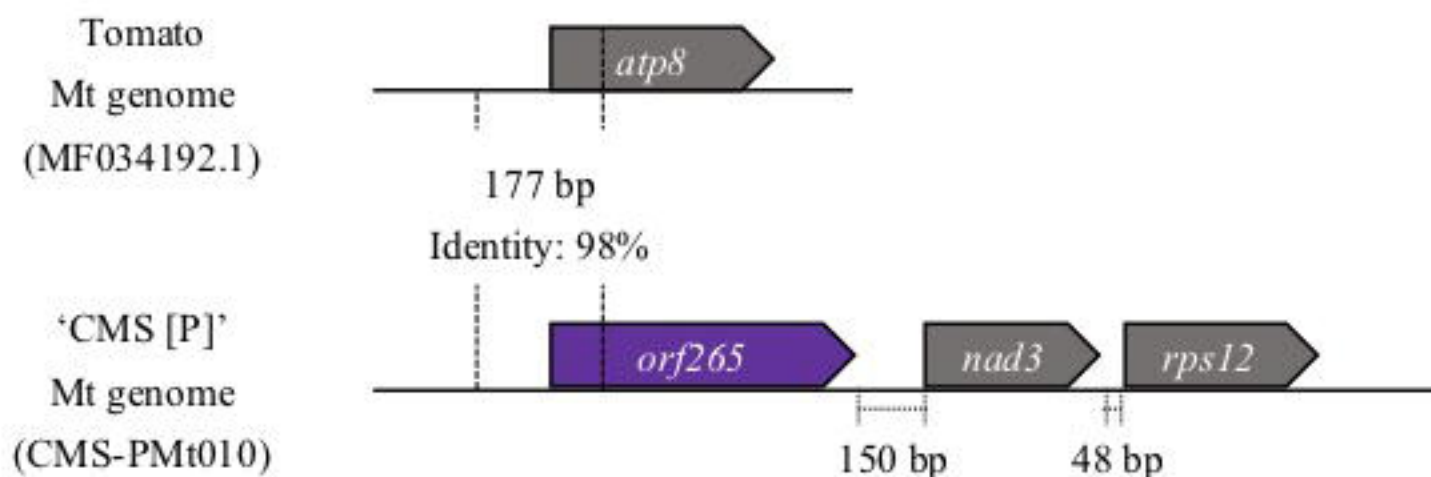



**A**

'CMS[P]' anther

'CMS[MSA1]' anther

*orf137**orf193**orf265**orf265 - rps12**cox2*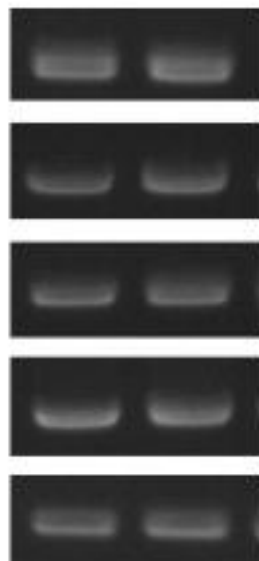**B**

'Dwarf CMS[P]'

Pollen (Dried)

Pollen (Incubated)

Anther

Leaf

Stem

Root

Ovary

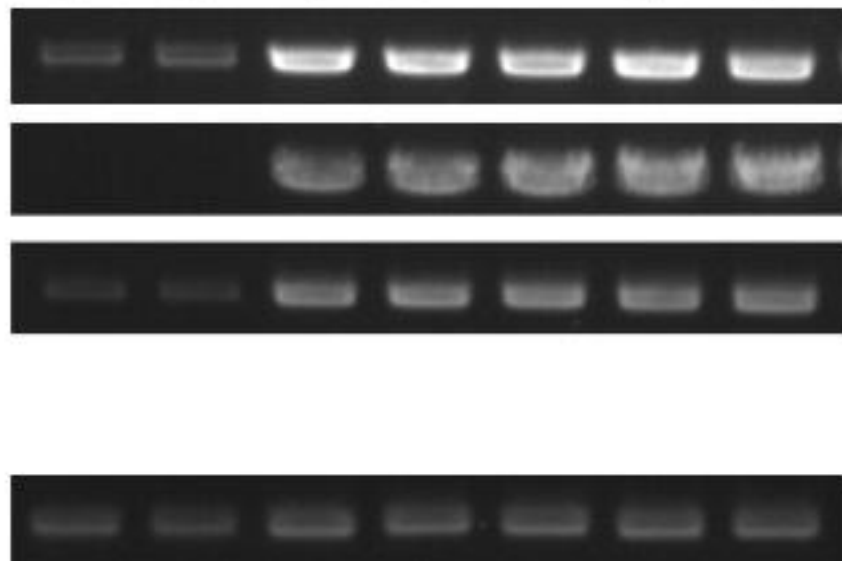

Source: https://www.biorxiv.org/content/10.1101/2021.03.03.433741v1.full.pdf
